# Supplementary material for: PD-1 downregulation enhances CAR-T cell antitumor efficiency by preserving a cell memory phenotype and reducing exhaustion
Source: PubMed Central journal article supplement — J Immunother Cancer. 2024 Apr 8;12(4):e008429. doi: 10.1136/jitc-2023-008429 (PMC11015237; doi:10.1136/jitc-2023-008429), 2024-04-08
Supplement: jitc-2023-008429supp001.pdf [file jitc-2023-008429supp001.pdf]

**Extended Data figures**

Fig S1. Characterization of BCMA/PD-L1/PD-L2 in bone marrow and extramedullary disease of R/R MM.

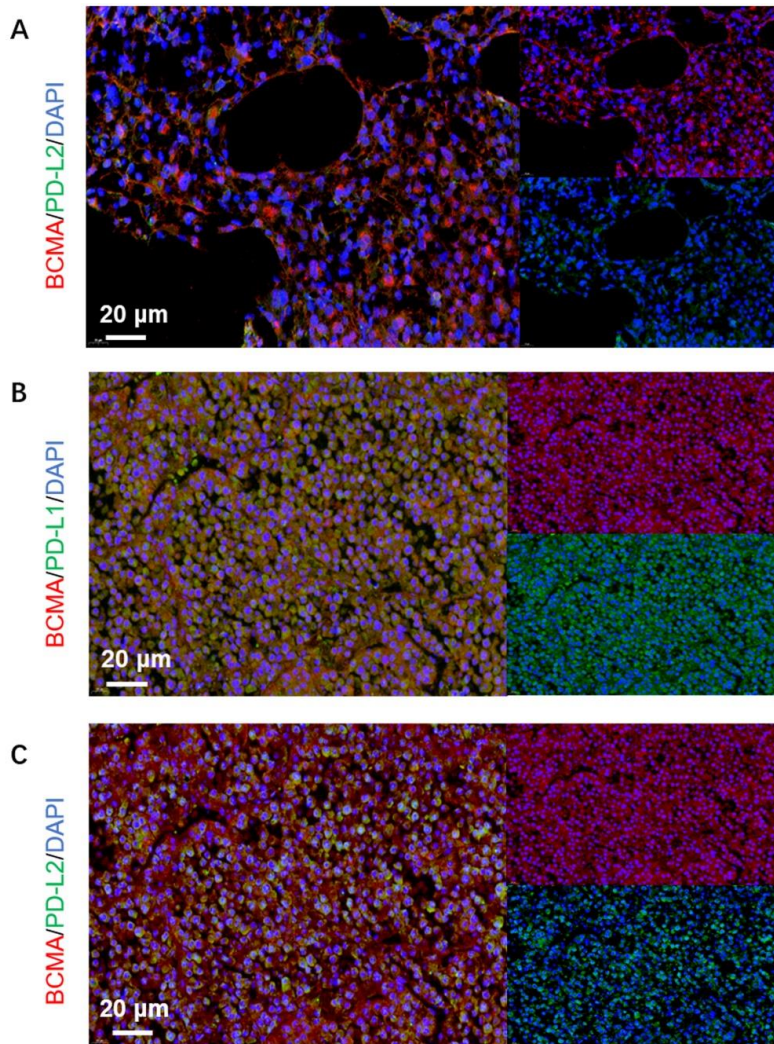

- A. Representative immunofluorescence staining pictures showing the expression of PD-L2 and their colocalization in BM sample from R/R MM patient. Scale bar, 20 mm.
- B. Representative immunofluorescence staining pictures showing the expression of PD-L1 and their colocalization in extramedullary disease sample from R/R MM patient. Scale bar, 20 mm.
- C. Representative immunofluorescence staining pictures showing the expression of PD-L2 and

their colocalization in extramedullary disease sample from R/R MM patient. Scale bar, 20 mm.

Fig S2. PD-L1 overexpression results in decreased cytotoxicity and cytokine secretion

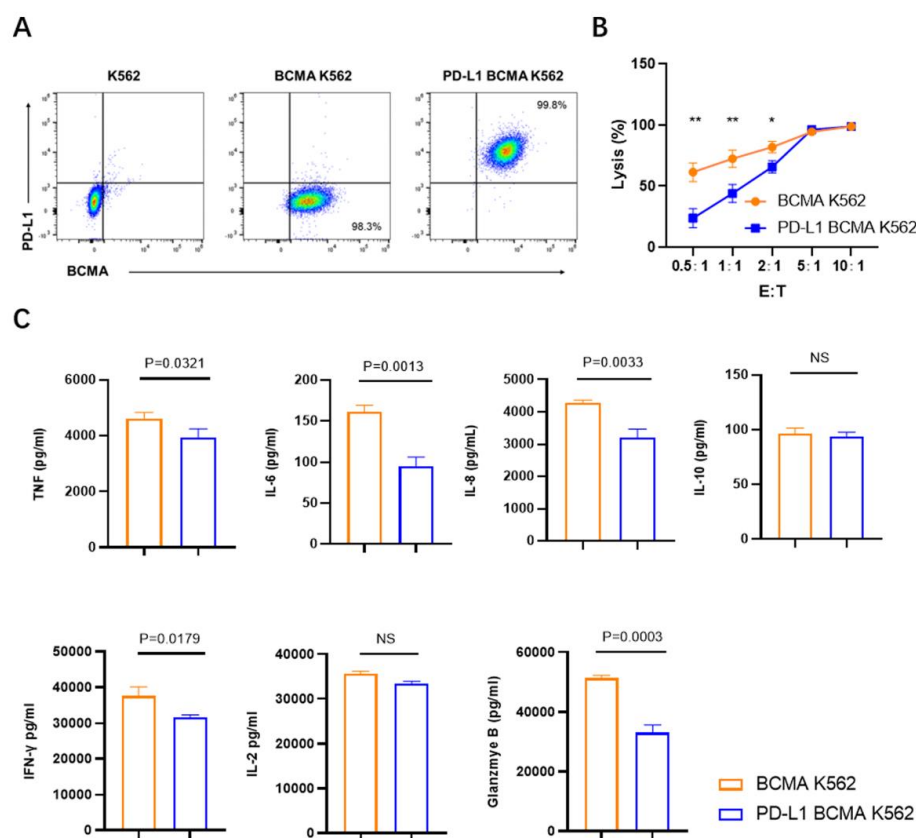

- A. Identification of BCMA over-expressed K562 cells and PD-L1/BCMA over-expressed K562 cells by flow cytometry.
- B. In vitro cytotoxicity of BCMA targeting CAR-T cells against BCMA over-expressed K562 cells and PD-L1/BCMA over-expressed K562 cells was determined by luciferase-based cytotoxicity assay. E/T ratio, effector/target ratio. Data are shown as the mean  $\pm$  s.e.m. (n=3 independent healthy donors). Statistical significance was determined by Mantel-Cox test, presented by \*\*P < 0.01, \*P < 0.05.
- C. Cytokine secretion measured by luminex technology in the supernatant after co-culture with PD-L1/BCMA over-expressed K562 cells for 24 h. Data are shown as the mean  $\pm$  s.e.m.

(n = 3 independent healthy donors). IL-2, interleukin-2; IL-6, interleukin-6; IL-8, interleukin-8; TNF $\alpha$ , tumor necrosis factor  $\alpha$ ; IFN $\gamma$ , interferon- $\gamma$

Fig S3. Construction and Validation of an shRNA-Specific Predictive Algorithm

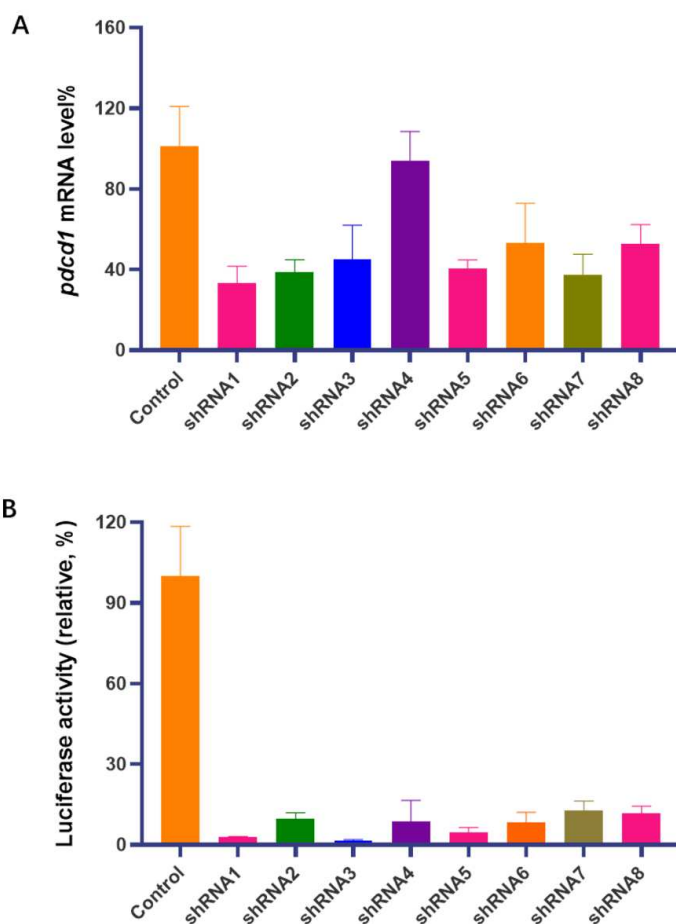

- A. Knockdown efficiencies for shRNAs targeting the human gene *PDCD1* within the retroviral vector which contains *PDCD1*, luciferase gene and anti-PD-1 shRNA scaffold. Expression of *PDCD1* in 293T cells was tested by qPCR.
- B. Knockdown efficiencies for shRNAs targeting the human gene firefly luciferase gene within the retroviral vector which contains *PDCD1*, luciferase gene and anti-PD-1 shRNA scaffold. Expression of luciferase in 293T cells was tested by Dual-Luciferase Reporter Assay.

Fig S4. Anti-tumor efficacy was verified in anti-CLL-1 and anti-CD19 CAR-T cells with or without anti-PD-1 shRNA construct.

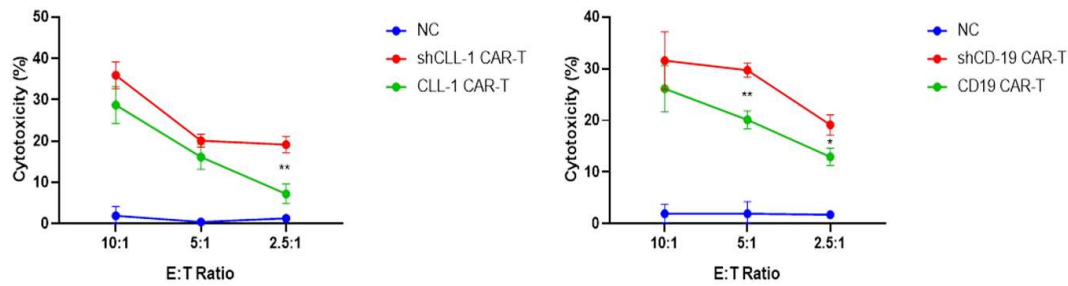

In vitro cytotoxicity of CLL-1 targeting CAR-T cells against PD-L1/CLL-1 over expressed U937 cells or CD19 targeting CAR-T cells against PD-L1 over expressed Raji cells was determined by LDH-based cytotoxicity assay. E/T ratio, effector/target ratio. Data are shown as the mean  $\pm$  s.e.m. (n=3 independent healthy donors). Statistical significance was determined by Mantel-Cox test, presented by \*\*P < 0.01, \*P < 0.05.

Fig S5. The principal component analysis for bulk RNA-seq data

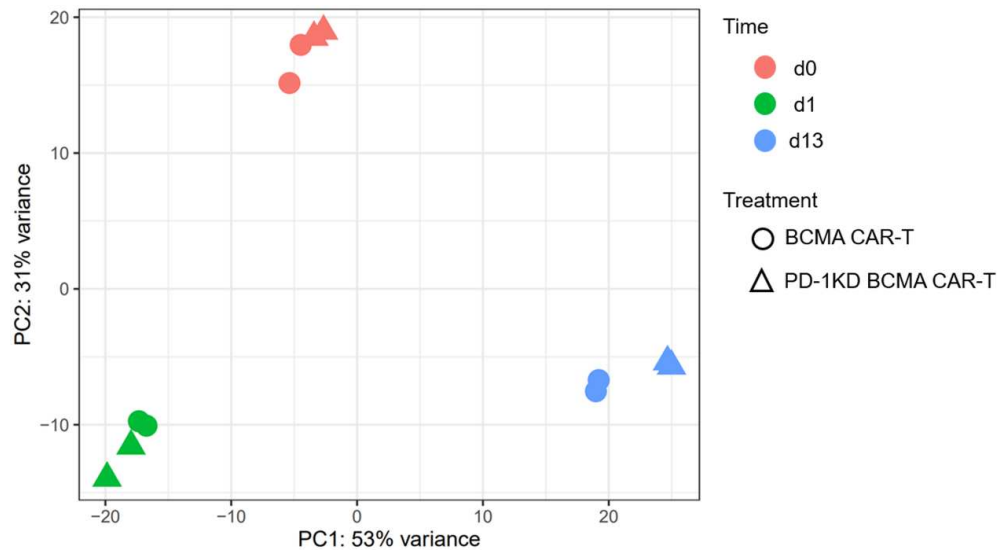

The PCA was utilized to elucidate the variation in the bulk RNA transcriptomes. The transcripts of BCMA targeting CAR-T cells with and without PD-1 shRNA in a separate time overlapped, whereas the transcripts in different timepoints make distinct clusters. Data shown are from two independent healthy donors.

Fig S6. Clinical response after CAR-T infusion.

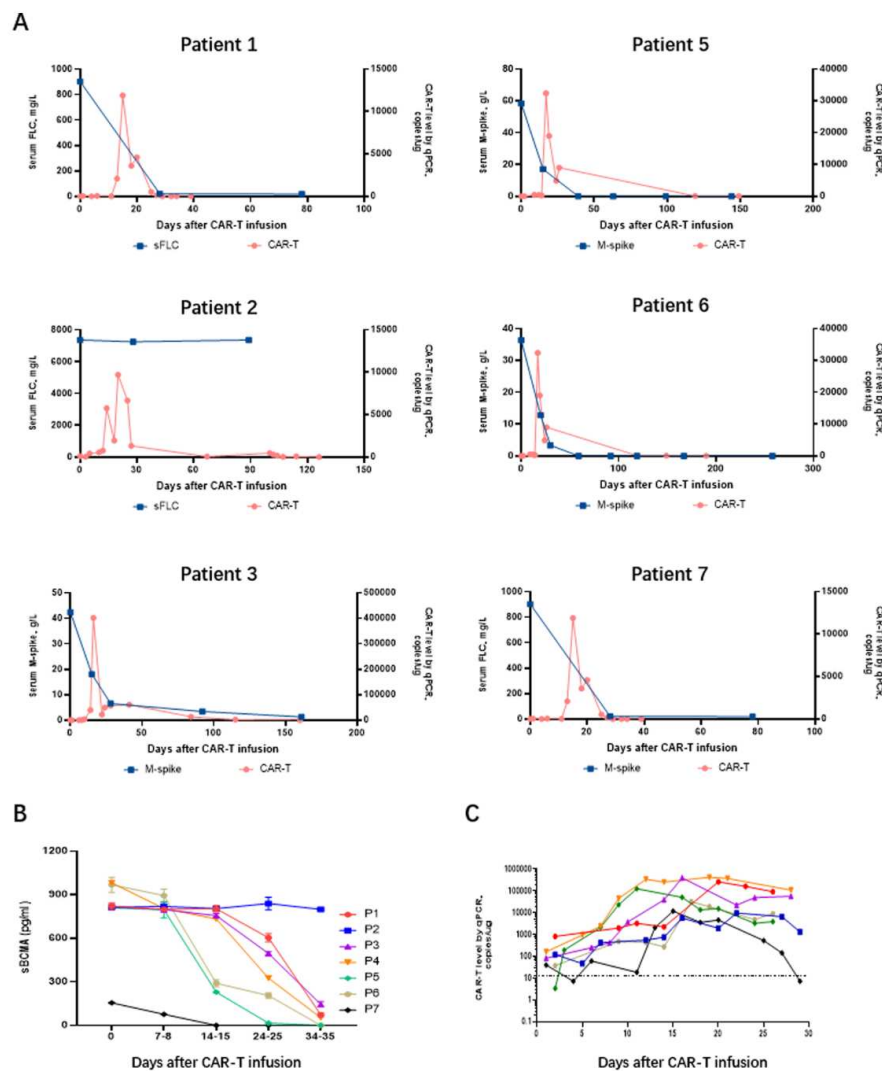

- A. All patients except patient 2 exhibited a marked decline in serum M-spike or serum free light chain (blue) after CAR-T cell infusion coincident with a rise in numbers of circulating CAR-T cells (pink). sFLC, serum free light chain.
- B. Dynamics of sBCMA concentrations in the plasma determined by ELISA assay.
- C. Peripheral blood levels of CART-BCMA in the first 30 days after infusion determined by

## qPCR for vector sequences

Fig S7. In vitro and in vivo evaluation of PD-1<sup>KD</sup> BCMA CAR-T cells products.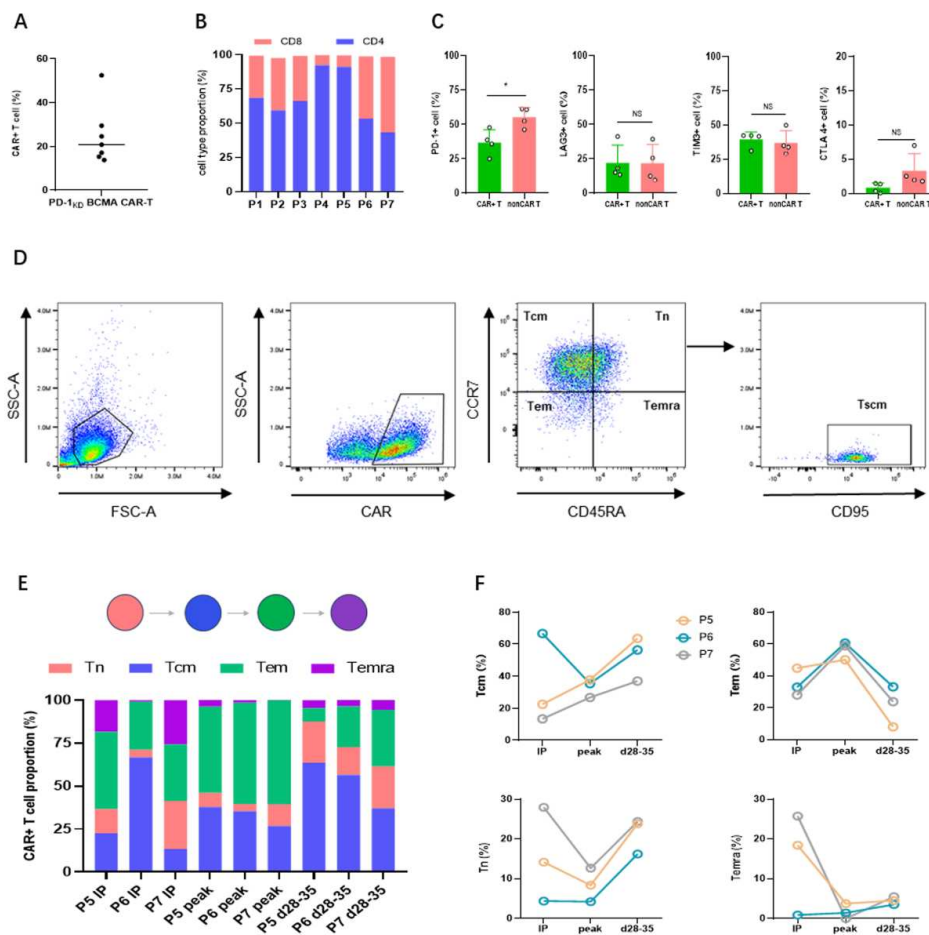

A. Percentage of CAR+ cells in the final products of the seven RR MM patients.

B. CD4+ and CD8+ cell proportion in the final products of the seven RR MM patients.

C. Comparison of PD1/LAG3/TIM3/CTLA4 expression in CAR+ and CAR- cells detected by flow cytometry without antigen stimulation in four representative infusion products. \*P < 0.05.

D. Gating scheme used for the identification of CAR+ T cell subtypes.

E. Immunophenotypic characterization of three highly responsive patients with either CR or

sCR in the product and after infusion. IP, infused product.

- F. Longitudinal contribution of each subpopulation to the CAR cell compartment in the three highly responsive patients.
