# Supplementary material for: PD-1 downregulation enhances CAR-T cell antitumor efficiency by preserving a cell memory phenotype and reducing exhaustion
Source: PubMed Central journal article supplement — J Immunother Cancer. 2024 Apr 8;12(4):e008429. doi: 10.1136/jitc-2023-008429 (PMC11015237; doi:10.1136/jitc-2023-008429), 2024-04-08
Supplement: jitc-2023-008429supp002.pdf [file jitc-2023-008429supp002.pdf]

**Supplementary Table S1. Signature genes list**

| <b>Signature</b> | <b>Positive regulation of cytokine production</b> |          |          |          |         |          |          |         |        |        |       |  |  |  |  |
|------------------|---------------------------------------------------|----------|----------|----------|---------|----------|----------|---------|--------|--------|-------|--|--|--|--|
| <b>Genes</b>     | ABCC8                                             | ABL1     | ADAM17   | ADAM8    | ADCYAP1 | ADIPOQ   | ADORA2B  |         |        |        |       |  |  |  |  |
|                  | ADRA2A                                            | AFAP1L2  | AGER     | AGPAT1   | AGPAT2  | AGTAIF1  | AIM2     | AIRE    |        |        |       |  |  |  |  |
|                  | AKAP12                                            | AKIRIN2  | ALOX15B  | ANXA1    | APOA2   | APPAPPL1 | ARFGEF2  |         |        |        |       |  |  |  |  |
|                  | ARHGEF2                                           | ARID5A   | ARNT     | ARRDC4   | ATF2    | ATF4     | ATP6AP2  | AZU1    |        |        |       |  |  |  |  |
|                  | B2MBATF                                           | BCL10    | BCL3     | BMPR1A   | BRCA1   | BTK      | BTN3A1   | BTN3A2  |        |        |       |  |  |  |  |
|                  | C1QTNF3                                           | C1QTNF4  | C3       | C3AR1    | C5      | C5AR1    | CADM1    | CAMK4   |        |        |       |  |  |  |  |
|                  | CARD11                                            | CARD8    | CARD9    | CASP1    | CASP8   | CCBE1    | CCDC88B  | CCL1    |        |        |       |  |  |  |  |
|                  | CCL19                                             | CCL3     | CCR2     | CCR7     | CD14    | CD160    | CD2CD200 | CD226   |        |        |       |  |  |  |  |
|                  | CD244                                             | CD274    | CD276    | CD28     | CD34    | CD36     | CD3E     | CD4CD40 |        |        |       |  |  |  |  |
|                  | CD40LG                                            | CD46     | CD55     | CD58     | CD6CD74 | CD80     | CD81     | CD83    |        |        |       |  |  |  |  |
|                  | CD84                                              | CD86     | CEACAM20 | CEBPB    | CEBPG   | CGAS     | CHI3L1   | CHIA    |        |        |       |  |  |  |  |
|                  | CHUK                                              | CLEC4E   | CLEC5A   | CLEC6A   | CLEC7A  | CLEC9A   | CLECL1P  | CLNK    |        |        |       |  |  |  |  |
|                  | CLUCRLF2                                          | CRTAM    | CSF1R    | CSF2     | CX3CL1  | CXCL17   | CYBA     | CYBB    |        |        |       |  |  |  |  |
|                  | CYP1B1                                            | CYRIB    | DDIT3    | DDTDDX1  | DDX21   | DDX3X    | DEFA5    | DEFB124 |        |        |       |  |  |  |  |
|                  | DENND1B                                           | DHX33    | DHX36    | DHX58    | DHX9    | DRD2     | EBI3     | EGR1    |        |        |       |  |  |  |  |
|                  | EIF2AK2                                           | EIF2AK3  | ELANE    | EPHB2    | EPXEREG | F2R      | F2RL1    | F3      | FADD   |        |       |  |  |  |  |
|                  | FCER1G                                            | FCGR3A   | FCN1     | FERMT1   | FFAR2   | FFAR3    | FGR      | FLOT1   | FLT4   |        |       |  |  |  |  |
|                  | FOXP1                                             | FOXP3    | FRMD8    | FZD5     | G3BP1   | GAPDH    | GARIN5A  | GATA3   |        |        |       |  |  |  |  |
|                  | GATA4                                             | GATA6    | GBP5     | GDF2     | GLMN    | GPRC5B   | GPSM3    | GSDMD   | H19    |        |       |  |  |  |  |
|                  | HAVCR2                                            | HDAC2    | HEG1     | HGF      | HLA2    | HIF1A    | HILPDA   | HK1     | HLA-A  |        |       |  |  |  |  |
|                  | HLA-DPA1                                          | HLA-DPB1 | HLA-E    | HLA-F    | HLA-G   | HMGB1    | HMGB2    | HMHB1   |        |        |       |  |  |  |  |
|                  | HMOX1                                             | HPSE     | HRAS     | HSP90AA1 | HSPA1A  | HSPA1B   | HSPB1    | HSPD1   |        |        |       |  |  |  |  |
|                  | HTR2B                                             | HYAL2    | IDO1     | IFI16    | IFIH1   | IFNG     | IFNGR1   | IFNL1   | IGHD   |        |       |  |  |  |  |
|                  | IKBKE                                             | IL10     | IL12A    | IL12B    | IL12RB1 | IL12RB2  | IL13     | IL15    | IL16   | IL17A  | IL17B |  |  |  |  |
|                  | IL17D                                             | IL17F    | IL17RA   | IL17RC   | IL18    | IL18R1   | IL1A     | IL1B    | IL1R1  |        |       |  |  |  |  |
|                  | IL1RL1                                            | IL1RL2   | IL2      | IL20RB   | IL21    | IL23A    | IL23R    | IL26    | IL27   | IL27RA | IL33  |  |  |  |  |
|                  | IL36A                                             | IL4      | IL4R     | IL6      | IL6R    | IL6ST    | IL7      | IL9     | INAVA  | INS    | IRAK1 |  |  |  |  |
|                  | IRAK3                                             | IRF1     | IRF3     | IRF4     | IRF5    | IRF7     | IRF8     | ISG15   | ISL1   |        |       |  |  |  |  |
|                  | ITK                                               | JAK2     | KAT2A    | KCNQ1OT1 | KIR2DL4 | KIT      | KLRC4    | KLRK1   | KLRF2  |        |       |  |  |  |  |
|                  | KLRK1                                             | KPNA6    | LACC1    | LAMTOR5  | LAPTM5  | LBP      | LEP      | LGALS9  | LILRA2 |        |       |  |  |  |  |
|                  | LILRA5                                            | LILRB1   | LILRB2   | LPL      | LRRK2   | LTA      | LTB      | LUM     | LURAP1 | LY9    | LY96  |  |  |  |  |
|                  | MALT1                                             | MAP3K7   | MAPK11   | MAPK13   | MAPK14  | MAPK9    | MAPKAPK2 | MAVS    |        |        |       |  |  |  |  |
|                  | MBP                                               | MCOLN2   | MDK      | MEFV     | MIF     | MIR132   | MIR144   | MIR145  | MIR149 |        |       |  |  |  |  |
|                  | MIR17                                             | MIR182   | MIR206   | MIR21    | MIR27B  | MIR324   | MIR657   | MIR675  |        |        |       |  |  |  |  |
|                  | MIR92A1                                           | MMP12    | MMP8     | MYB      | MYD88   | NAIP     | NFAM1    | NFATC4  | NLRC4  |        |       |  |  |  |  |
|                  | NLRP1                                             | NLRP10   | NLRP12   | NLRP2    | NLRP3   | NLRP9    | NMB      | NMBR    | NOD1   |        |       |  |  |  |  |
|                  | NOD2                                              | NODAL    | NOS2     | NOX1     | NOX5    | NR1H4    | NR4A3    | OAS1    | OAS2   |        |       |  |  |  |  |
|                  | OAS3                                              | ORM1     | ORM2     | OSM      | P2RX7   | PAEP     | PANX1    | PANX2   | PANX3  |        |       |  |  |  |  |
|                  | PARK7                                             | PDE4B    | PDE4D    | PELI1    | PF4     | PHB1     | PIBF1    | PIK3CD  | PIK3CG |        |       |  |  |  |  |
|                  | PIK3R1                                            | PLA2G1B  | PLA2G3   | PLA2R1   | PLCB1   | PLCG2    | PNPP     | POLR3A  |        |        |       |  |  |  |  |
|                  | POLR3B                                            | POLR3C   | POLR3D   | POLR3F   | POLR3G  | POSTN    | POU2AF1  | POU2F2  |        |        |       |  |  |  |  |
|                  | PQBP1                                             | PRG2     | PRG3     | PRKCQ    | PRKCZ   | PRKD2    | PSEN1    | PTAFR   |        |        |       |  |  |  |  |

---

PTGER4 PTGS2 PTPN11 PTPN22 PTPRC PTPRJ PYCARDPYDC1 RAB1A  
RAB2B RAB7B RAD21 RAET1G RARA RASGRP1 RBM47 RELA  
RFTN1 RGCC RIGIRIOK3 RIPK1 RIPK2 RNF135 ROCK2 RORA  
RPS3 RSAD2 RUNX1 S100A13SAA1 SASH3 SCAMP5SCIMP SCRIB  
SELENOK SEMA7ASERPINB7 SERPINE1 SERPINF2 SETD2 SETD4  
SIGLEC16 SIRT1 SLAMF1 SLAMF6 SLC11A1 SLC7A5 SMAD3 SOD1  
SORL1 SPHK1 SPHK2 SPNSPON2 SPTBN1 SRC STAT1 STAT3  
STAT5B STING1 STMP1 STOML2 SULF1 SULF2 SYKTANK TBK1  
TBX21 TGFB1 THBS1 TICAM1 TICAM2 TIGIT TIRAP TLR1 TLR2  
TLR3 TLR4 TLR5 TLR6 TLR7 TLR8 TLR9 TMED10  
TMEM106A TMF1 TMIGD2 TNFTNFRSF14 TNFRSF8 TNFSF4 TNXB  
TOMM70TRAF2 TRAF3 TRAF3IP3 TRAF6 TREM2 TRIM15 TRIM16  
TRIM27 TRIM32 TRIM56 TRIM6 TRIM65 TRPV4 TSLP TUSC2  
TWIST1 TXKTYK2 TYROBPUCN UNC93B1 USP50 VTCN1 WNT11  
WNT3A WNT5A XBP1 XCL1 XIAP ZBTB20 ZBTB7B ZC3HAV1  
ZCCHC3 ZFPM1 ZNF580 ZP3

---

**Source** <https://www.gsea-msigdb.org/gsea/msigdb/human/geneset>

---
