# Supplementary material for: PD-1 downregulation enhances CAR-T cell antitumor efficiency by preserving a cell memory phenotype and reducing exhaustion
Source: PubMed Central journal article supplement — J Immunother Cancer. 2024 Apr 8;12(4):e008429. doi: 10.1136/jitc-2023-008429 (PMC11015237; doi:10.1136/jitc-2023-008429), 2024-04-08
Supplement: jitc-2023-008429supp003.pdf [file jitc-2023-008429supp003.pdf]

**Supplementary Table S2. Signature genes list**

| <b>Signature</b> | <b>T cell proliferation</b>                                                                                                                                                                                                                                                                                                                                                                                                                                                                                                                                                                                                                                                                                                                                                                                                                                                                                                                                                                                                                                                                                                                                                                                                                                                                                                                                                                                              |
|------------------|--------------------------------------------------------------------------------------------------------------------------------------------------------------------------------------------------------------------------------------------------------------------------------------------------------------------------------------------------------------------------------------------------------------------------------------------------------------------------------------------------------------------------------------------------------------------------------------------------------------------------------------------------------------------------------------------------------------------------------------------------------------------------------------------------------------------------------------------------------------------------------------------------------------------------------------------------------------------------------------------------------------------------------------------------------------------------------------------------------------------------------------------------------------------------------------------------------------------------------------------------------------------------------------------------------------------------------------------------------------------------------------------------------------------------|
| <b>Genes</b>     | ABL1 AGER AIF1 ANXA1 ARG1 ARG2 ARMC5 BAXBCL6<br>BID BMI1 BMP4 BTN2A2 BTN3A1 CADM1 CARD11 CASP3 CBLB<br>CCDC88B CCL19 CCL5 CCND3 CCR2 CD151 CD1D CD209<br>CD24 CD274 CD276 CD28 CD3E CD40LG CD46 CD55 CD6<br>CD70 CD80 CD81 CD86 CEBPB CLCCLEC4G CLECL1P<br>CORO1A CR1CRTAM CTLA4 CTNNB1 CTPS1 DHPS DLG1 DLG5<br>DNAJA3 DOCK2 DOCK8 EBI3 EFNB1 ELF4 EPO ERBB2 FADD<br>FKBP1B FOXP3 FOXP3 FYNGLMN GPAM GPNMB HAVCR2 HES1<br>HHLA2 HLA-A HLA-DMB HLA-DPA1 HLA-DPB1 HLA-DRB1 HLA-E<br>HLA-G HMGB1 ICOSLG IDO1 IGF1 IGF2 IGFBP2 IHH IL10IL12B<br>IL12RB1 IL15IL18IL1A1IL1BIL2 IL20RB IL21IL23A IL23R IL27IL2RA IL4<br>IL4I1 IL6 IL6ST IRF1 ITCH JAK2 KITLG LEP LGALS3<br>LGALS9 LGALS9B LGALS9C LILRB1 LILRB2 LILRB4 LIPALMBR1L<br>LMO1 LRRC32 MAD1L1 MALT1 MAPK8IP1 MARCHF7 MIR181C<br>MIR21 MIR30B MSN NCK1 NCK2 NCKAP1L NCSTN NDFIP1<br>P2RX7 PAWR PDCD1LG2 PDE5A PELI1 PIK3CG PLA2G2A<br>PLA2G2D PLA2G2E PLA2G2F PLA2G5 PNPPPP3CA PPP3CB PRDX2<br>PRKAR1A PRKCQ PRNP PSMB10 PTPN22 PTPN6 PTPRC PYCARD<br>RAC2 RASAL3 RASGRP1 RC3H1 RC3H2 RIPK2 RIPK3 RPS3<br>RPS6 SASH3 SCGB1A1 SCRIB SDC4 SELENOK SFTPD<br>SH2D2A SH3RF1 SHH SLAMF1 SLC11A1 SLC4A2 SLC7A1 SOS1<br>SOS2 SPNSPTA1 STAT5B SYKTFRC TGFBR2 TMEM131L TMIGD2<br>TNFRSF13C TNFRSF14 TNFRSF1B TNFRSF21 TNFRSF4 TNFRSF9<br>TNFSF13B TNFSF14 TNFSF18 TNFSF4 TNFSF8 TNFSF9 TP53<br>TRAF6 TSPAN32 TWSG1 TYK2 VCAM1 VSIG4 VSIR VTCN1<br>WNT4 XCL1 ZAP70 ZBTB7B ZP3 ZP4 |
| <b>Source</b>    | <a href="https://www.gsea-msigdb.org/gsea/msigdb/human/geneset">https://www.gsea-msigdb.org/gsea/msigdb/human/geneset</a>                                                                                                                                                                                                                                                                                                                                                                                                                                                                                                                                                                                                                                                                                                                                                                                                                                                                                                                                                                                                                                                                                                                                                                                                                                                                                                |
