# Supplementary material for: PD-1 downregulation enhances CAR-T cell antitumor efficiency by preserving a cell memory phenotype and reducing exhaustion
Source: PubMed Central journal article supplement — J Immunother Cancer. 2024 Apr 8;12(4):e008429. doi: 10.1136/jitc-2023-008429 (PMC11015237; doi:10.1136/jitc-2023-008429), 2024-04-08
Supplement: jitc-2023-008429supp004.pdf [file jitc-2023-008429supp004.pdf]

**Supplementary Table S3. Signature genes list**

| <b>Signature</b> | <b>Cent memory CD4 T cell vs TH1 up</b>                                                                                                                                                                                                                                                                                                                                                                                                                                                                                                                                                                                                                                                                                                                                                                                                                                                                                                                                                                                                                                                                                                                                                                                                                                                                                                                                                 |
|------------------|-----------------------------------------------------------------------------------------------------------------------------------------------------------------------------------------------------------------------------------------------------------------------------------------------------------------------------------------------------------------------------------------------------------------------------------------------------------------------------------------------------------------------------------------------------------------------------------------------------------------------------------------------------------------------------------------------------------------------------------------------------------------------------------------------------------------------------------------------------------------------------------------------------------------------------------------------------------------------------------------------------------------------------------------------------------------------------------------------------------------------------------------------------------------------------------------------------------------------------------------------------------------------------------------------------------------------------------------------------------------------------------------|
| <b>Genes</b>     | ABCD4 AHCYL2 AMBN AMHR2 AMIGO2 ANXA1 AQP3 ARHGAP15<br>ARHGAP26 ATP2C2 ATXN7L3B BACH2 BBS1 BIN1 BOK<br>BTN2A1 C1orf115 C1orf56 CABP5 CAPN3 CAPRIN2 CARS2 CCNT2<br>CD300A CD44 CD84 CHMP7 CIRBP CLDN16 CLOCK CLSTN1<br>COX7A1 CPN1 CPQ CSGALNACT1 CSPG4 CSRP3 CTSS CUL4A<br>CUZD1 CYB561 DCLK1 DENND1B DENND5A DGCR8 DIDO1 DMTF1<br>DNAH2 DPY19L2P2 DUOX2 ECE1 EEF2 EFCAB14 EMSY EPHA1<br>EXOC1 F8 FAM13B FCN3 FGF22 FGF9 FKBP10 FOXL1 FRAT1<br>FTOGABRA3 GATA3 GCNT4 GLRA3 GOLGA8A GPR6 GPRASP1<br>GSE1 H2AC25 HAS2 HBP1 HCG4B HLA-C HLA-DPB1 HLA-F<br>HRC IFNAR2 IL18 IMPACT ITIH4 JMJD1C KATNIP KBTBD2 KCNN3<br>KIR2DL2 KRT36 LMBR1L LONP2 LRRC1 LRRC37BP1 LUC7L3 LY75<br>LZTFL1 MAGEA4 MAP3K5 MARCHF8 MDFIC MED25 MEGF6 MIA2<br>MKKS MKRN1 MMP10 MTRF1L MUC7 MVB12B NACA NCK2<br>NHLRC2 NOX3 NR3C1 OCEL1 OSBPL8 PATZ1 PCDH8 PCF11 PCNX2<br>PDE3B PHF1 PI4KA PIK3IP1 PIK3R1 PKD1P6 PLAC8 PLSCR3 POGZ<br>POPDC2 PRKY PRL PRPF3 PSORS1C1 PTC2 RAB11FIP4 RABL3<br>RADX RAPGEF6 RBP3 RHO RIC3 RORC RPL39 RPLP2<br>RPS17P5 RUFY1 S100A8 SCML1 SIRPG SLC35E2B SLC46A3<br>SMIM7 SMURF1 SNX29 SP3P SPATA7 SSPN SSTR1 STAG3L4<br>STUB1 SULT1B1 TCF7 TDRKH TENM1 TEX28 THRB TP53TG1<br>TP73-AS1 TRANK1 TRAPPC2 TREH TRIM13 TRIM44 TSPAN6 TTC17<br>TTC30A TUBG2 TXNRD3 UBASH3A USP25 VAMP1 VTCN1 ZBTB18<br>ZBTB25 ZBTB7A ZCWPW1 ZFP36L2 ZFYVE9 ZNF117 ZNF14 ZNF202<br>ZNF266 ZNF337 ZNF432 ZNF529 |
| <b>Source</b>    | <a href="https://www.gsea-msigdb.org/gsea/msigdb/human/geneset/GSE3982">https://www.gsea-msigdb.org/gsea/msigdb/human/geneset/GSE3982</a>                                                                                                                                                                                                                                                                                                                                                                                                                                                                                                                                                                                                                                                                                                                                                                                                                                                                                                                                                                                                                                                                                                                                                                                                                                               |
