# Supplementary material for: PD-1 downregulation enhances CAR-T cell antitumor efficiency by preserving a cell memory phenotype and reducing exhaustion
Source: PubMed Central journal article supplement — J Immunother Cancer. 2024 Apr 8;12(4):e008429. doi: 10.1136/jitc-2023-008429 (PMC11015237; doi:10.1136/jitc-2023-008429), 2024-04-08
Supplement: jitc-2023-008429supp005.pdf [file jitc-2023-008429supp005.pdf]

**Supplementary Table S4. Signature genes list**

| <b>Signature</b> | <b>Effector vs exhausted CD8 T cell up</b>                                                                                                                                                                                                                                                                                                                                                                                                                                                                                                                                                                                                                                                                                                                                                                                                                                                                                                                                                                                                                                                                                                                                                                                                                                                                                                                              |
|------------------|-------------------------------------------------------------------------------------------------------------------------------------------------------------------------------------------------------------------------------------------------------------------------------------------------------------------------------------------------------------------------------------------------------------------------------------------------------------------------------------------------------------------------------------------------------------------------------------------------------------------------------------------------------------------------------------------------------------------------------------------------------------------------------------------------------------------------------------------------------------------------------------------------------------------------------------------------------------------------------------------------------------------------------------------------------------------------------------------------------------------------------------------------------------------------------------------------------------------------------------------------------------------------------------------------------------------------------------------------------------------------|
| <b>Genes</b>     | ABCA2 ACP5 AK3 ANAPC16 ANAPC5 ANXA1 ANXA6 AP1M1<br>ARFRP1 ARL4C ATP5PO ATP6V0B ATP6V0C AURKAIP1 AXIN1<br>B4GALT1 BCKDK BLVRA BNIP3L BRAP BSCL2 C8orf33 CAB39L<br>CALU CCNDBP1 CCR2 CDC37 CDKN2DCHFR CIB1 CMAS<br>CMTM7 COMMD7 CORO1B CPT2 CSRP3 CTSA CTSD DAP<br>DBI DCPS DCTN5 DDX41 DEAF1 DGKA DHRS1 DNAJB1 DNMI<br>DPEP1 DPM2 DUS1L DYM EBNA1BP2 EFTUD2 EIF2B4 EIF2B5<br>EIF2S1 EIF3B EIF3L EIF4A3 EIF6 ELAVL1 ENTPD4 ETS1<br>FAM117A FAM89B FCGR2B FEZ2 FGFR3 FHL2 GCAT GDAP2<br>GIT1 GLIPR2 GOLM1 GPC1 GRAMD2B GSTT2 HADHB HCLS1<br>HERPUD1 HIKESHI HIPK1 HMCES HNRNPAB HSD11B1 ICAM2<br>IFITM10 IL17RA IL18RAP ISYNA1 ITGAL ITGAX ITGB7 JKAMP KCNJ8<br>KIAA2013 KLK8 KLRC1 KLRD1 KLRG1 KLRK1 LAMTOR4<br>LAMTOR5 LDAH LEF1 LGALS9B LRWD1 LSM1 LSM4 LY6H<br>LYSMD1 MACROH2A1MBP MFNG MIEN1 MKNK2 MLXMRPL34 MTCH1<br>MTMR1 MTSS2 NDUFB6 NSMCE1ORC5 PALD1 PCGF5 PDIA6 PHTF1<br>PIK3CD PIM2 PKP3 PLAC8 PLD3 PNPO PPIB PPIF PRIM2<br>PRKAG1 PRKCH PRPSAP1 PSMB2 PSMB3 PSMD13 PTPN6 PTTG1<br>RABGGTA RACGAP1 RAD17 REPS1 RMC1 RNF14 RNF167 RNPS1<br>RORA RPN1 RPP25L RPS6KA4 RSU1 SATB1 SCP2 SELENOH<br>SEMA4A SEPTIN6 SETD6 SLC1A5 SLC66A2 SMIM20 SMPD1 SNX1<br>SRP68 SRPK1 SSNA1 ST13 STK38 SWAP70 TBCB TIAM1<br>TIMM44 TMC6 TMEM147 TMEM208 TMEM223 TMEM45A<br>TSPAN31 TUBA3C TWF2 TXNL4A UBE2H UBE2Z UBQLN1 USP22<br>USP5 VAV1 WARS1 WTAP XPNPEP1 YIPF3 ZFYVE19 ZIK1 |
| <b>Source</b>    | <a href="https://www.gsea-msigdb.org/gsea/msigdb/human/geneset/GSE3982">https://www.gsea-msigdb.org/gsea/msigdb/human/geneset/GSE3982</a>                                                                                                                                                                                                                                                                                                                                                                                                                                                                                                                                                                                                                                                                                                                                                                                                                                                                                                                                                                                                                                                                                                                                                                                                                               |
