# Supplementary material for: PD-1 downregulation enhances CAR-T cell antitumor efficiency by preserving a cell memory phenotype and reducing exhaustion
Source: PubMed Central journal article supplement — J Immunother Cancer. 2024 Apr 8;12(4):e008429. doi: 10.1136/jitc-2023-008429 (PMC11015237; doi:10.1136/jitc-2023-008429), 2024-04-08
Supplement: jitc-2023-008429supp006.pdf [file jitc-2023-008429supp006.pdf]

**Supplementary Table S5. Specific therapies patients received before CAR-T cell therapy.**

| Patient | Lines | Treatment                                                                                         |                                                                                                                                                                                                                                                                                          |
|---------|-------|---------------------------------------------------------------------------------------------------|------------------------------------------------------------------------------------------------------------------------------------------------------------------------------------------------------------------------------------------------------------------------------------------|
| 1       | 4     | PAD<br>RCD<br>D-RICD<br>D-IMP                                                                     | <b>PAD:</b> Bortezomib, doxorubicin and dexamethasone<br><b>RCD:</b> Lenalidomide, cyclophosphamide and dexamethasone                                                                                                                                                                    |
| 2       | 6     | PAD<br>RCD<br>IRD<br>DECP<br>DRD<br>Dara+ P+DEAP                                                  | <b>D-RICD:</b> Daratumumab, lenalidomide, ixazomib, cyclophosphamide and dexamethasone<br><b>D-IMP:</b> Daratumumab, ixazomib, melphalan and prednisone<br><b>IRD:</b> Ixazomib, lenalidomide and dexamethasone<br><b>DECP:</b> Dexamethasone, etoposide, cyclophosphamide and cisplatin |
| 3       | 7     | PAD<br>PCD<br>VRD<br>RMP<br>IRD<br>Dara+DECP<br>P+IMP                                             | <b>DRD:</b> Daratumumab, lenalidomide and dexamethasone<br><b>Dara:</b> Daratumumab<br><b>P:</b> Pomalidomide<br><b>DEAP:</b> Dexamethasone, etoposide, doxorubicin and cisplatin                                                                                                        |
| 4       | 7     | PAD<br>VRAD<br>Dara+DECP+ Lenalidomide<br>IPD+RTX<br>doxorubicin +VEN<br>Bendamustine<br>VPD+PACE | <b>VRD:</b> Bortezomib, lenalidomide and dexamethasone<br><b>RMP:</b> Lenalidomide, melphalan and prednisone<br><b>IRD:</b> Ixazomib, lenalidomide and dexamethasone<br><b>VRAD:</b> Bortezomib, lenalidomide, doxorubicin and dexamethasone<br><b>Dara:</b> Daratumumab                 |
| 5       | 7     | RD<br>ICD<br>PAD<br>DPd<br>VPD+PACE<br>ASCT<br>Selinexor                                          | <b>IPD:</b> Ixazomib, pomalidomide and dexamethasone<br><b>RTX:</b> Radiation therapy<br><b>VEN:</b> Venetoclax<br><b>Rd:</b> Lenalidomide and dexamethasone<br><b>ICD:</b> Ixazomib, cyclophosphamide and dexamethasone                                                                 |
| 6       | 3     | PCD<br>VRD<br>ASCT                                                                                | <b>VPD:</b> Bortezomib, pomalidomide and dexamethasone<br><b>PACE:</b> Cisplatin, Adriamycin, cyclophosphamide and etoposide                                                                                                                                                             |
| 7       | 6     | PAD<br>VRD<br>ASCT<br>ICD<br>IMP<br>D-IMP                                                         | <b>DPd:</b> Daratumumab, pomalidomide, and dexamethasone<br><b>ASCT:</b> Autologous stem cell transplantation<br><b>Pom-Dex:</b> Pomalidomide and dexamethasone                                                                                                                          |
