# Supplementary material for: PD-1 downregulation enhances CAR-T cell antitumor efficiency by preserving a cell memory phenotype and reducing exhaustion
Source: PubMed Central journal article supplement — J Immunother Cancer. 2024 Apr 8;12(4):e008429. doi: 10.1136/jitc-2023-008429 (PMC11015237; doi:10.1136/jitc-2023-008429), 2024-04-08
Supplement: jitc-2023-008429supp007.pdf [file jitc-2023-008429supp007.pdf]

**Supplementary Table S6. Detail information about hematologic toxicity.**

| Hematologic toxicity | Any grade Within 30d | Grade $\geq 3$ Within 30d | Any grade at 30d | Grade $\geq 3$ at 30d | Any grade at 90d | Grade $\geq 3$ at 90d* |
|----------------------|----------------------|---------------------------|------------------|-----------------------|------------------|------------------------|
| Neutropenia          | 7                    | 5                         | 3                | 1                     | 0                | 0                      |
| Anemia               | 7                    | 5                         | 6                | 3                     | 3                | 1                      |
| Thrombocytopenia     | 7                    | 4                         | 4                | 3                     | 2                | 2                      |
| Lymphopenia          | 7                    | 7                         | 3                | 0                     | 2                | 0                      |

\* Among the three cases of grade 3 cytopenia at day 90 after CAR-T infusion, Grade 3 anemia and thrombocytopenia was found in patient 2 who was non-responsive to CAR-T therapy, suggesting a possible association with the disease progression. Another Grade 3 thrombocytopenia was found in patient 6 at day 90 and eventually recovered to 112,000 per cubic millimeter at day 120 after CAR-T infusion.
